# Supplementary material for: Seminal plasma cfDNA fragmentomics landscape delineates male infertility subtypes
Source: Research Square preprint supplement (doi:10.21203/rs.3.rs-6200607/v1), 2025-03-18
Supplement: Supplementary file 1 [file 4c887a5c35cdc0df93c21b7a.docx]

**Additional file 1**

**Seminal plasma cfDNA fragmentomics landscape delineates male infertility subtypes**

**Methods**

**Whole Genome Sequencing**

Whole Genome Sequencing (WGS) libraries were prepared using the Paired-End Sequencing Sample Preparation Kit (Illumina) with the following protocol. The fragmented DNA was subjected to end repair to convert the overhangs into blunt ends. This was achieved by treating the DNA with T4 DNA polymerase, Klenow fragment, and T4 polynucleotide kinase. Following end repair, an adenine (A) residue was added to the 3' ends of the DNA fragments using Klenow fragment (3' to 5' exo-). This A-tailing step facilitated the ligation of sequencing adapters, which contain a thymine (T) overhang, to the DNA fragments. Ligation was performed using T4 DNA ligase (New England Biolabs), attaching the Illumina multiplexing adapters to the A-tailed DNA fragments. The adapter-ligated DNA was purified using AMPure XP beads (Beckman Coulter) to remove any unligated adapters and other contaminants. The purified DNA fragments were then amplified by PCR using Phusion High-Fidelity DNA Polymerase (Thermo Fisher Scientific) to ensure sufficient quantities of the library for sequencing. Typically, 8-12 cycles of PCR were performed, with primers complementary to the adapter sequences. The quality and quantity of the prepared libraries were assessed using an Agilent 2100 Bioanalyzer with a High Sensitivity DNA Kit (Agilent Technologies). Libraries showing a prominent peak at the desired size (approximately 275 bp, including adapters) were deemed ready for sequencing. The amplified DNA libraries were then sequenced on an Illumina HiSeq 4000 system using a 150bp × 2 paired-end format.

**Jagged end sequencing with non-CpG cytosine methylation**

Jagged end sequencing (Jag-seq) was based on Lo’s study[1]. DNA libraries were constructed using a modified version of the Paired-End Sequencing Sample Preparation Kit (New England Biolabs). Following this, the Klenow Fragment (exo-) along with dATP, dGTP, dTTP, and methylated dCTP (5mC) were used to fill in the 5' overhangs, resulting in blunt ends. During this step, the Klenow fragment of DNA polymerase I (Escherichia coli) facilitated A-tailing, whereby an untemplated adenine was added to the 3' blunt ends. Finally, T4 DNA ligase (New England Biolabs) was used to ligate methylated sequencing adapters to the plasma DNA following end repair.

The adapter-ligated DNA underwent two rounds of bisulfite conversion using the EpiTect Plus DNA Bisulfite Kit (Qiagen) according to the manufacturer’s protocol. The bisulfite-converted DNA was then amplified through 8-11 cycles using KAPA HiFi HotStart Uracil + ReadyMix (Roche). The quality of each DNA library was evaluated using an Agilent 4200 TapeStation. Libraries were assessed for DNA size and quantity on a D1000 ScreenTape (Agilent) before sequencing. A peak around 275 bp indicated that the libraries were ready for sequencing. The amplified DNA libraries were then sequenced on an Illumina HiSeq 4000 system using a 150bp × 2 paired-end format.

**Sequencing alignment**

Following base-calling, the sequencing reads underwent preprocessing to remove adapter sequences and low-quality bases (quality score below 20). The resulting trimmed reads in FASTQ format were then aligned to the human (hg19) reference genome using BSMAP with the "unique pair" output option and default parameter settings[2]. For downstream analysis, only paired-end reads where both ends uniquely aligned to the same chromosome in the correct orientation, and with an insert size of ≤ 1000 bp, were considered.

**References**

1. Ding SC, Chan RWY, Peng W, Huang L, Zhou Z, Hu X, et al. Jagged Ends on Multinucleosomal Cell-Free DNA Serve as a Biomarker for Nuclease Activity and Systemic Lupus Erythematosus. Clinical chemistry. 2022;68(7):917-26.

2. Xi Y, Li W. BSMAP: whole genome bisulfite sequence MAPping program. BMC bioinformatics. 2009;10:232.


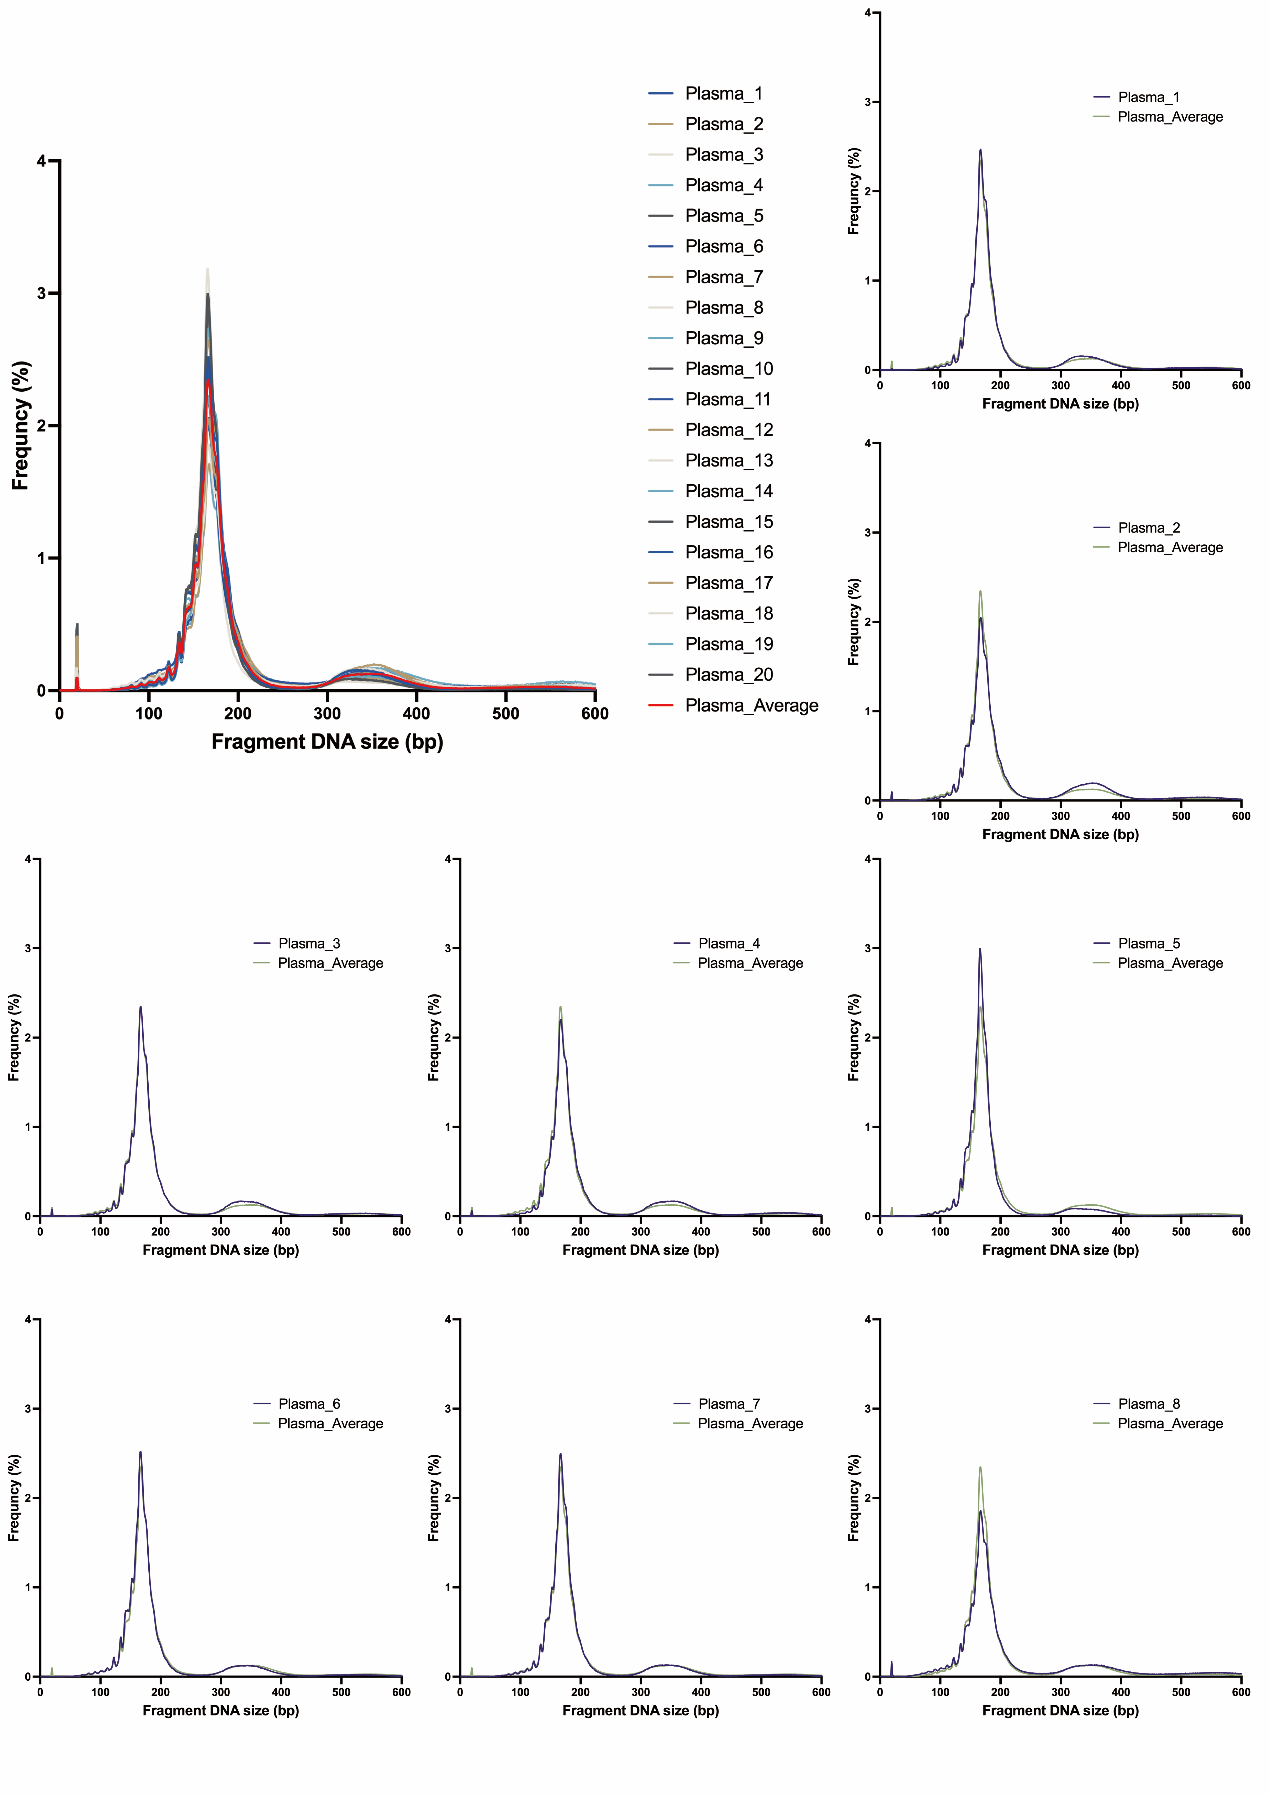

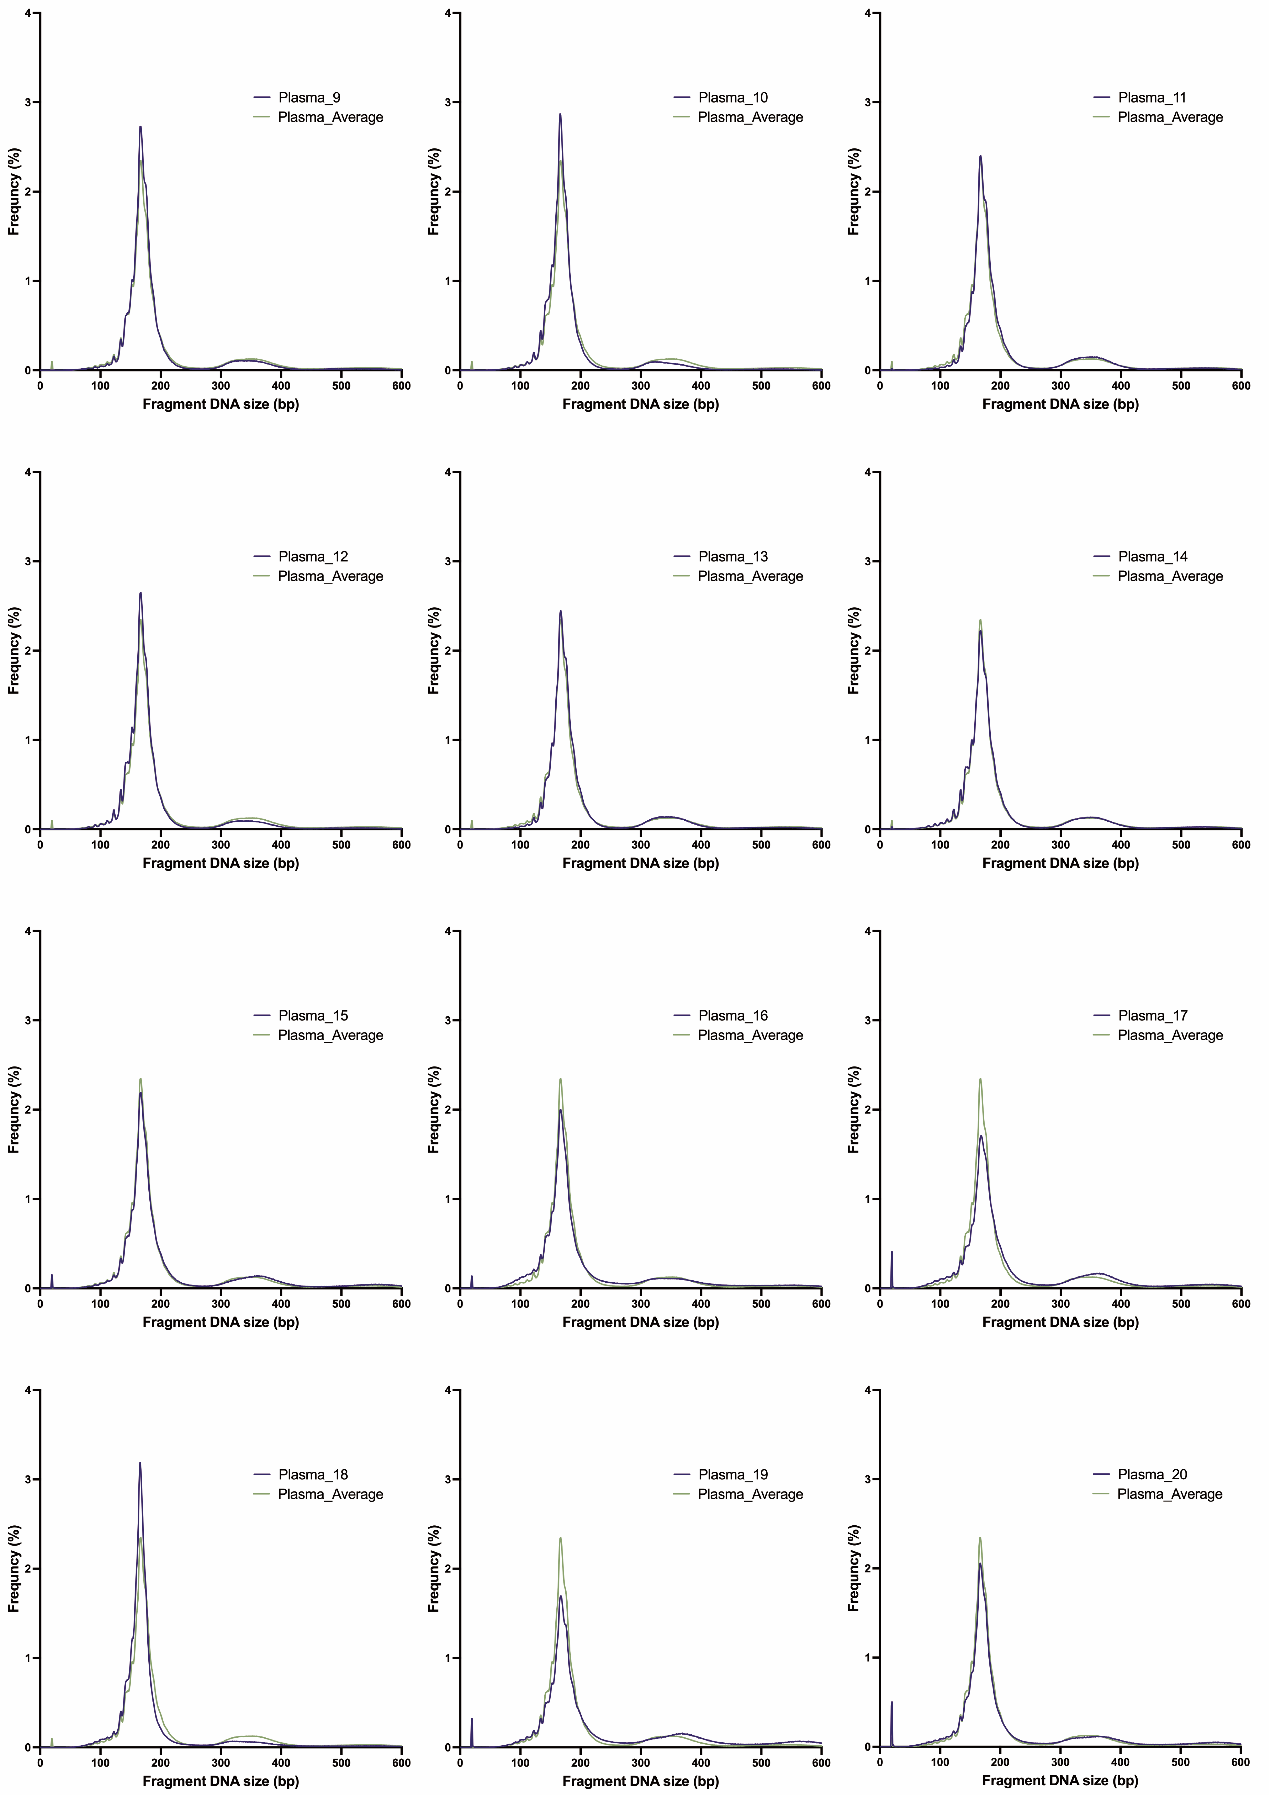


**Figure S1. Integrated and Individual Size Distributions of Blood Plasma Samples**

Aggregation plot showing a summary of the size distribution of all plasma samples (n=20). Separate smaller plots show the size distribution of individual plasma samples and the average of all plasma.


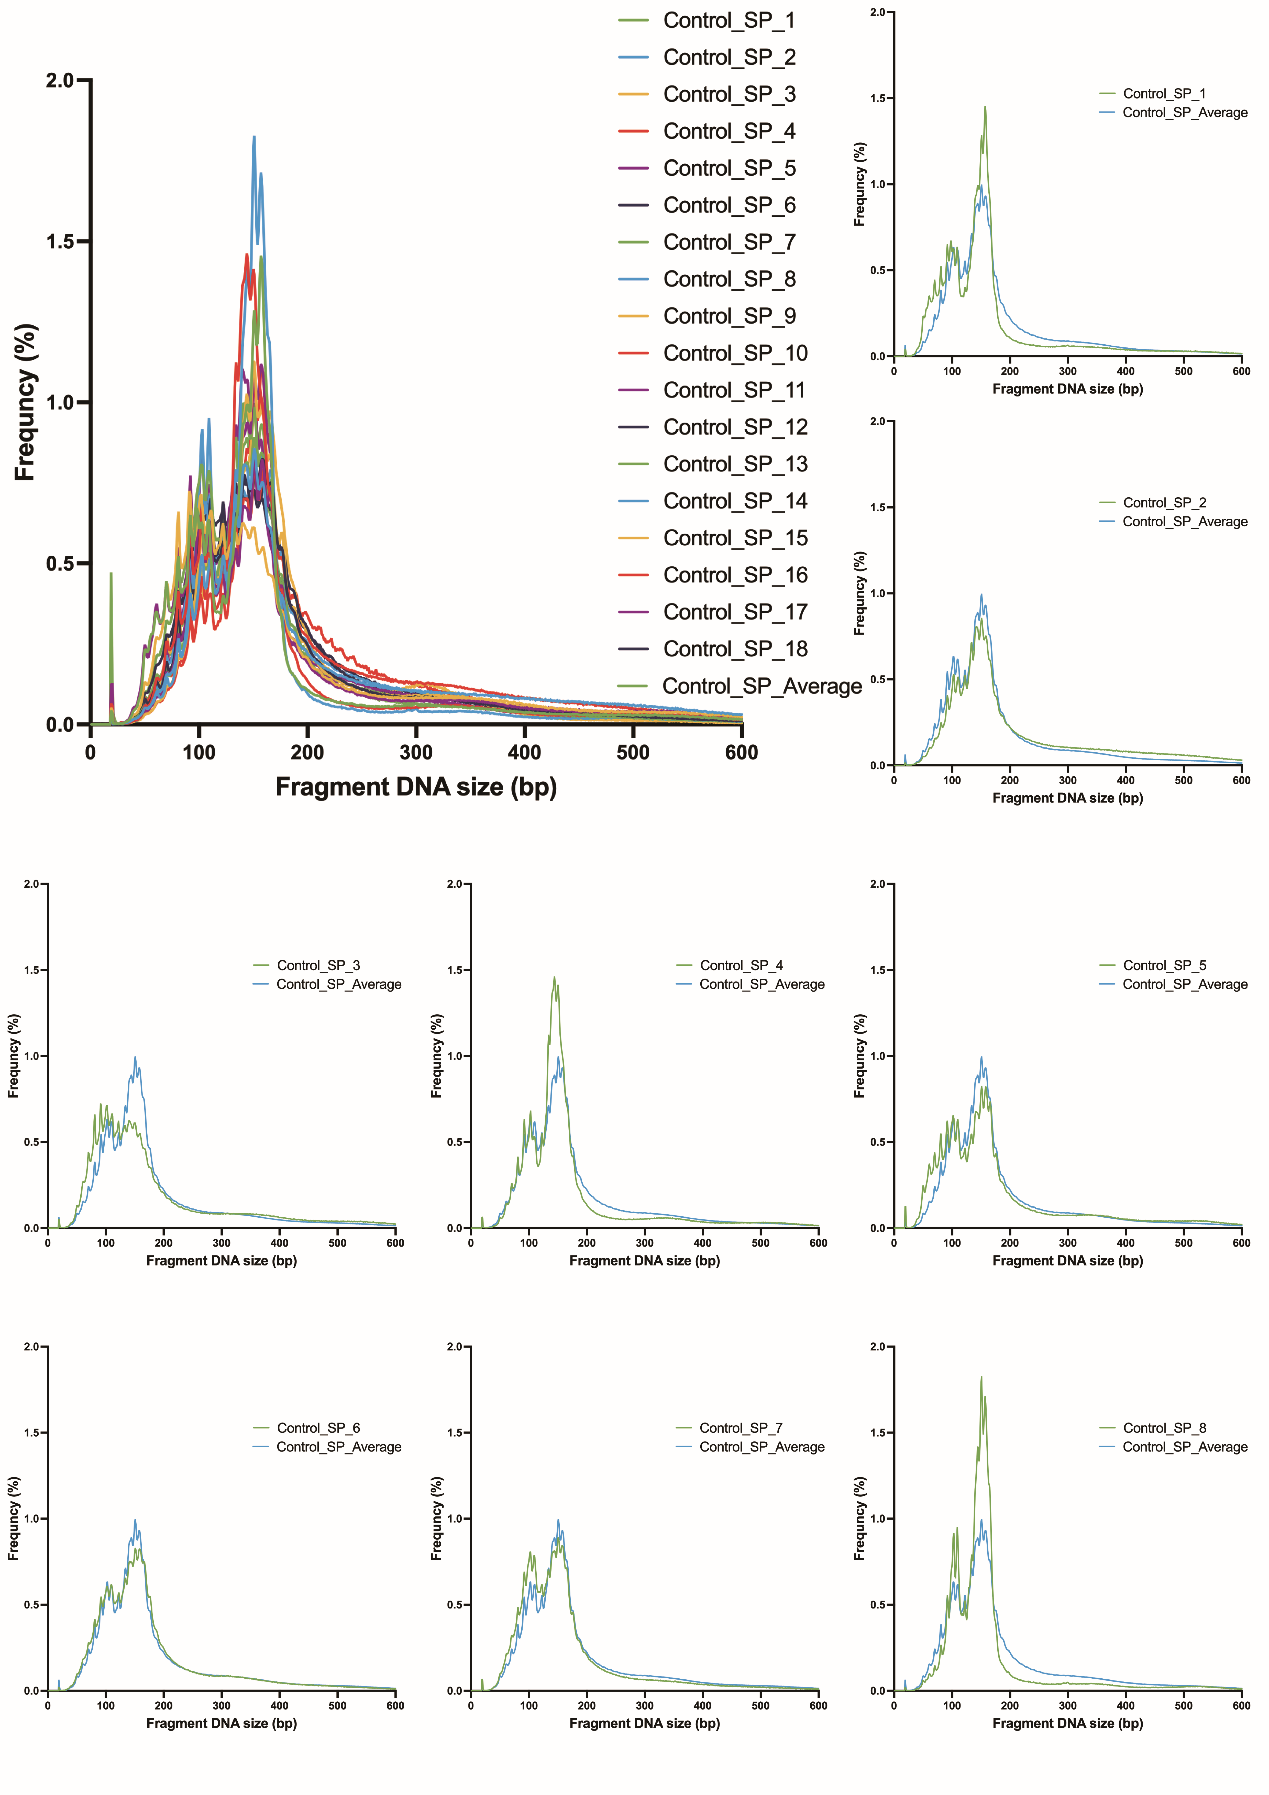

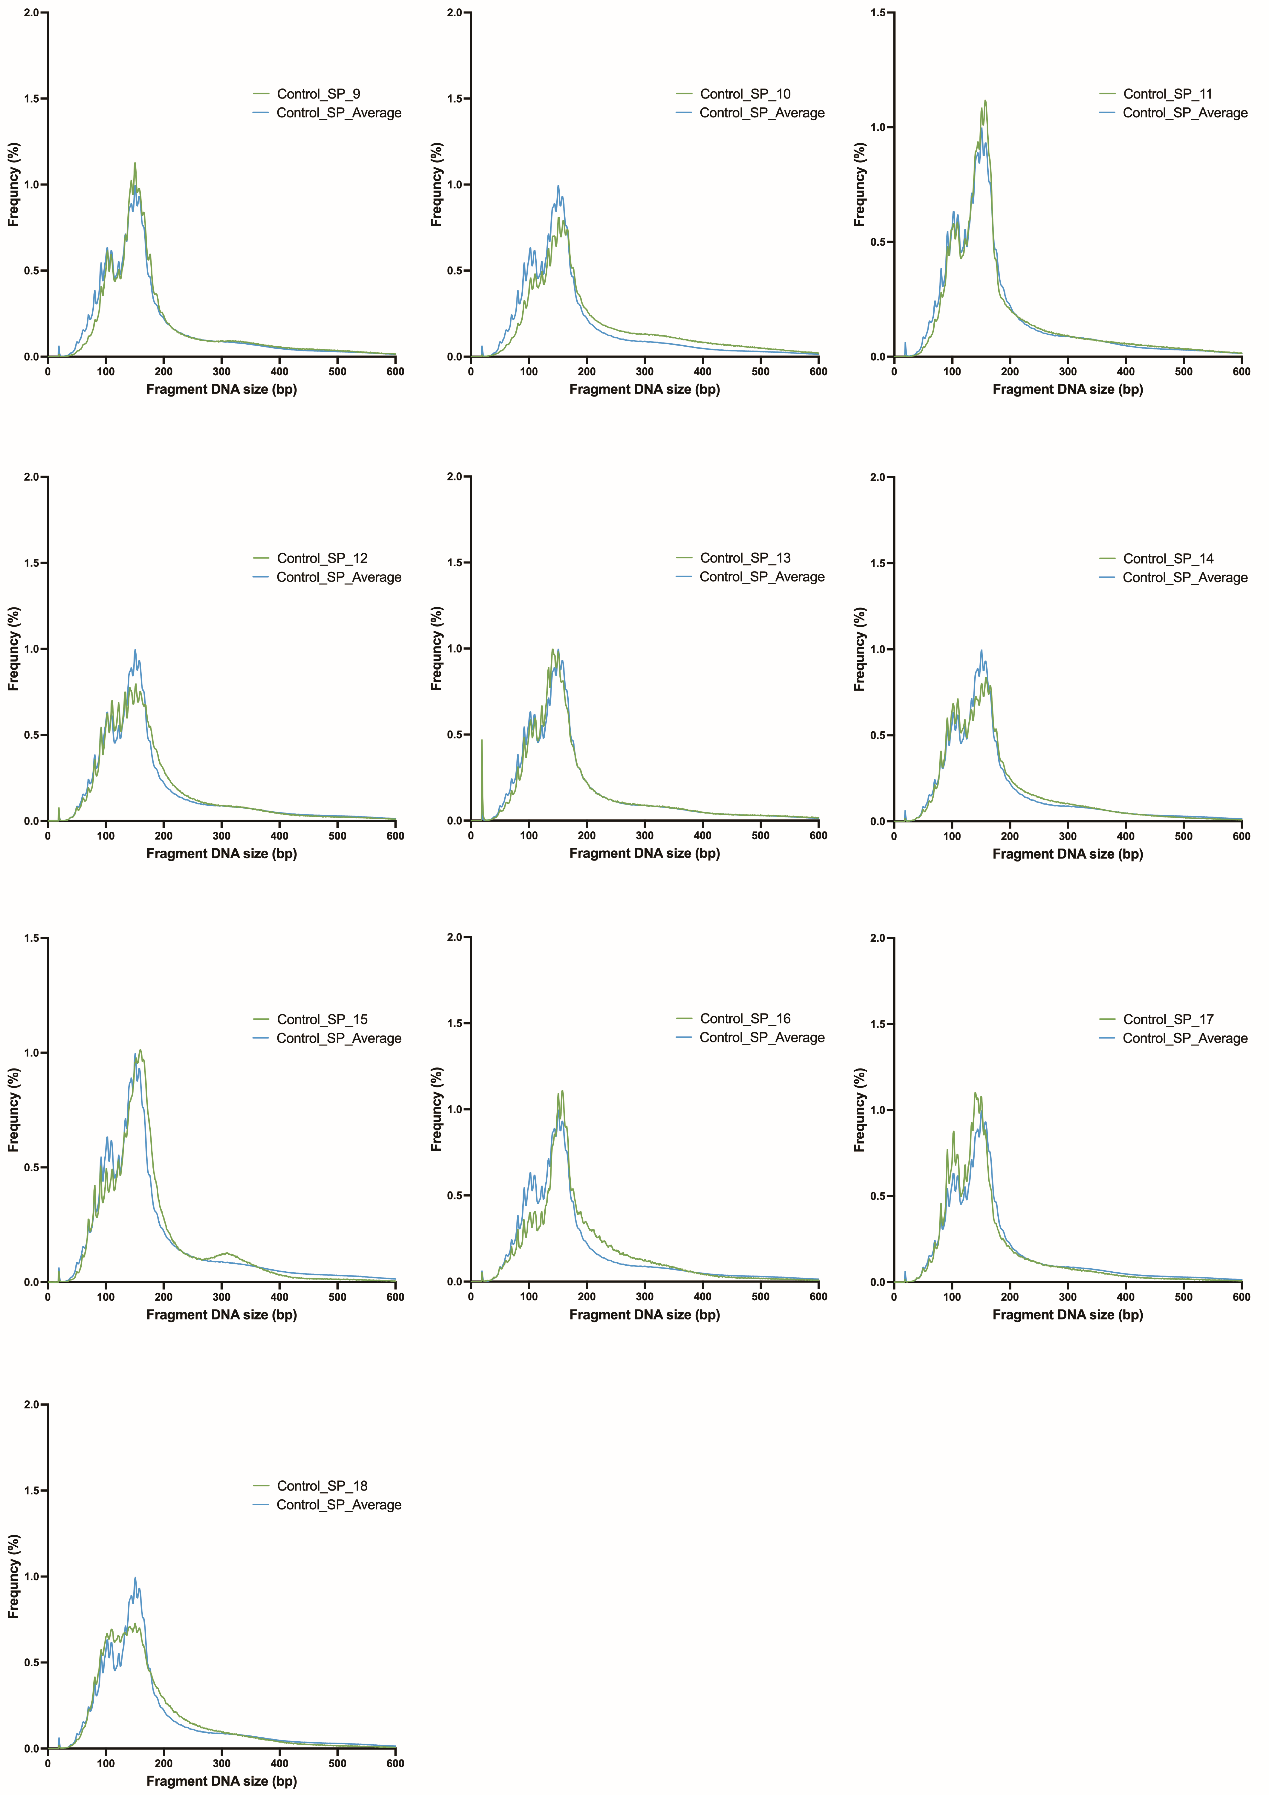


**Figure S2. Integrated and Individual Size Distributions of Control SP Samples**

Aggregation plot showing a summary of the size distribution of all control SP samples (n=18). Separate smaller plots show the size distribution of individual control SP samples and the average of all control SP.


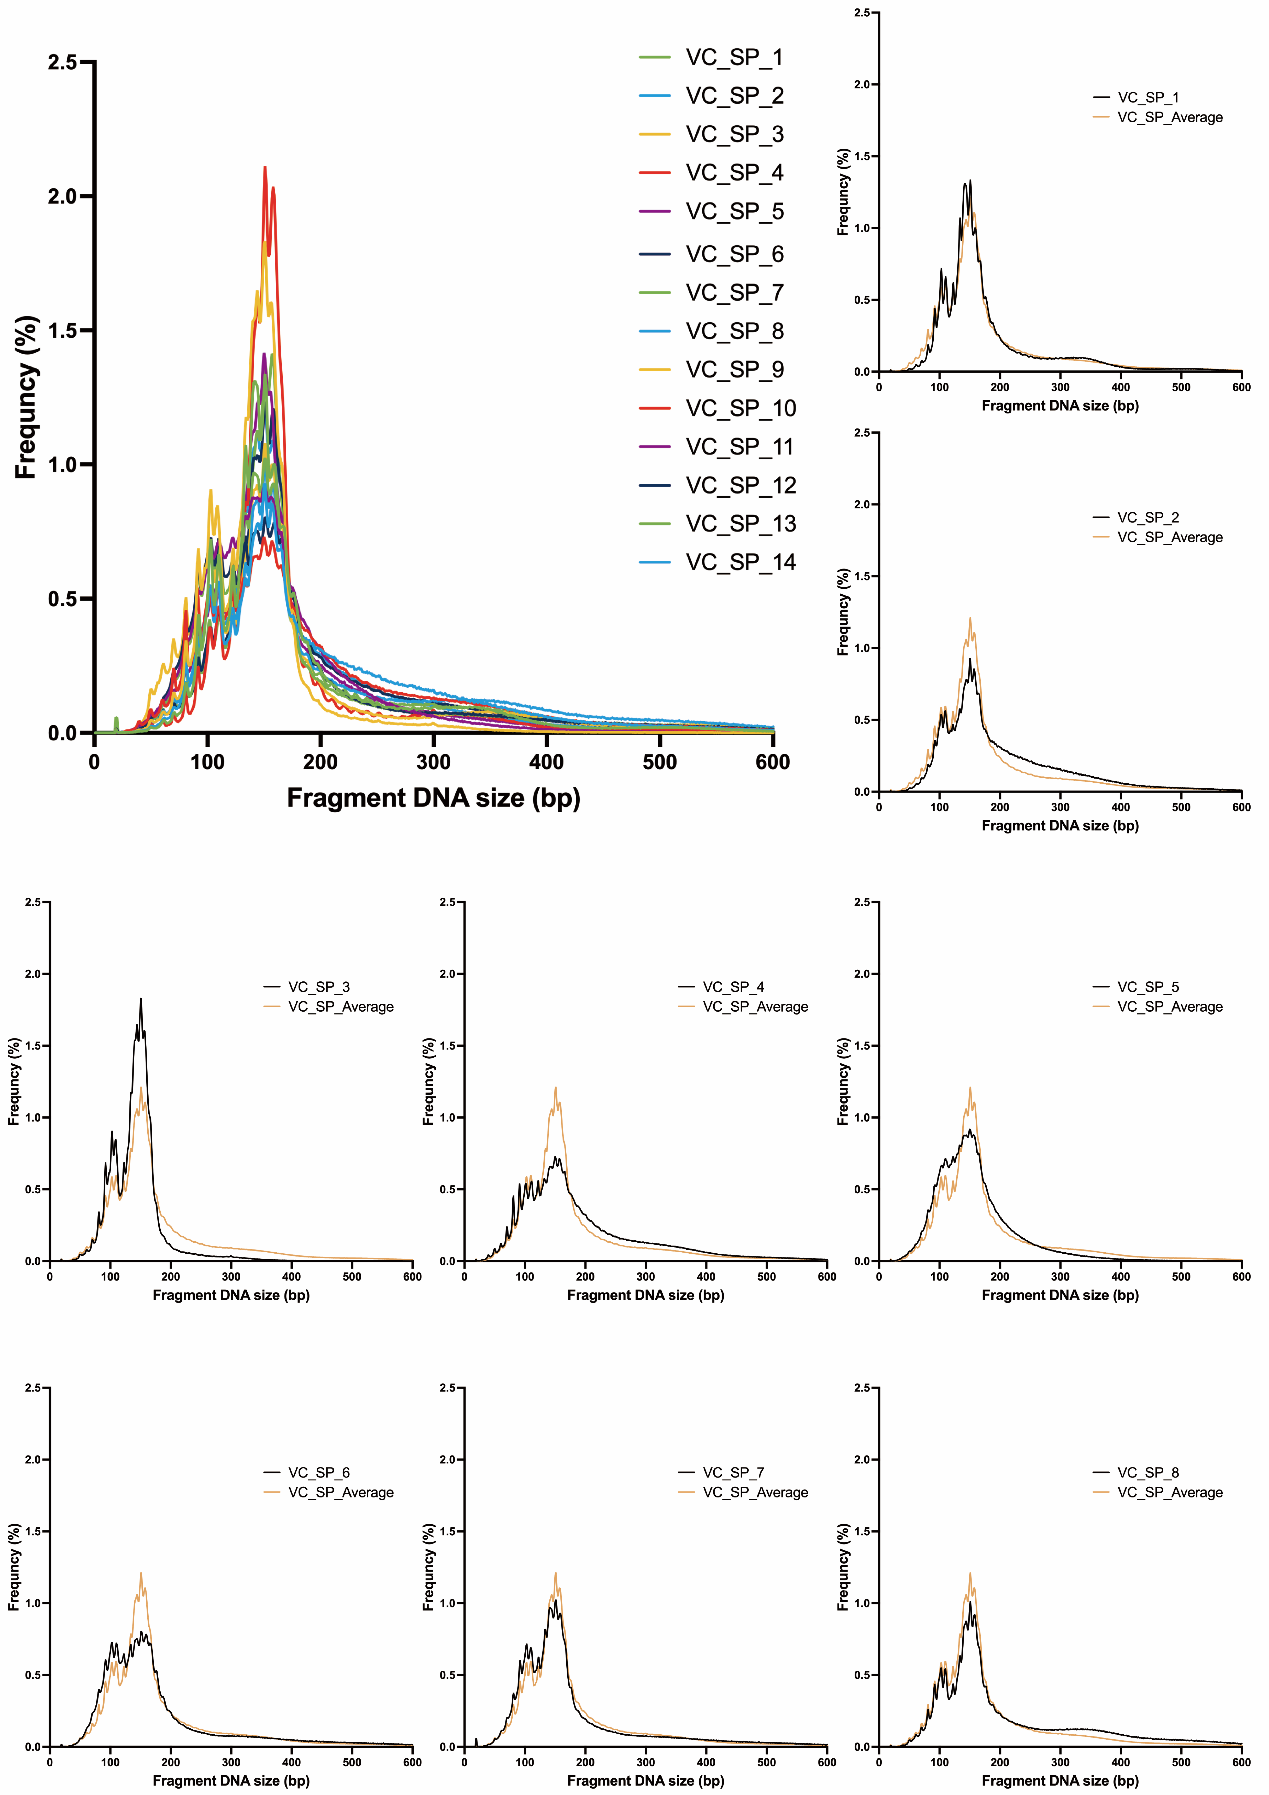

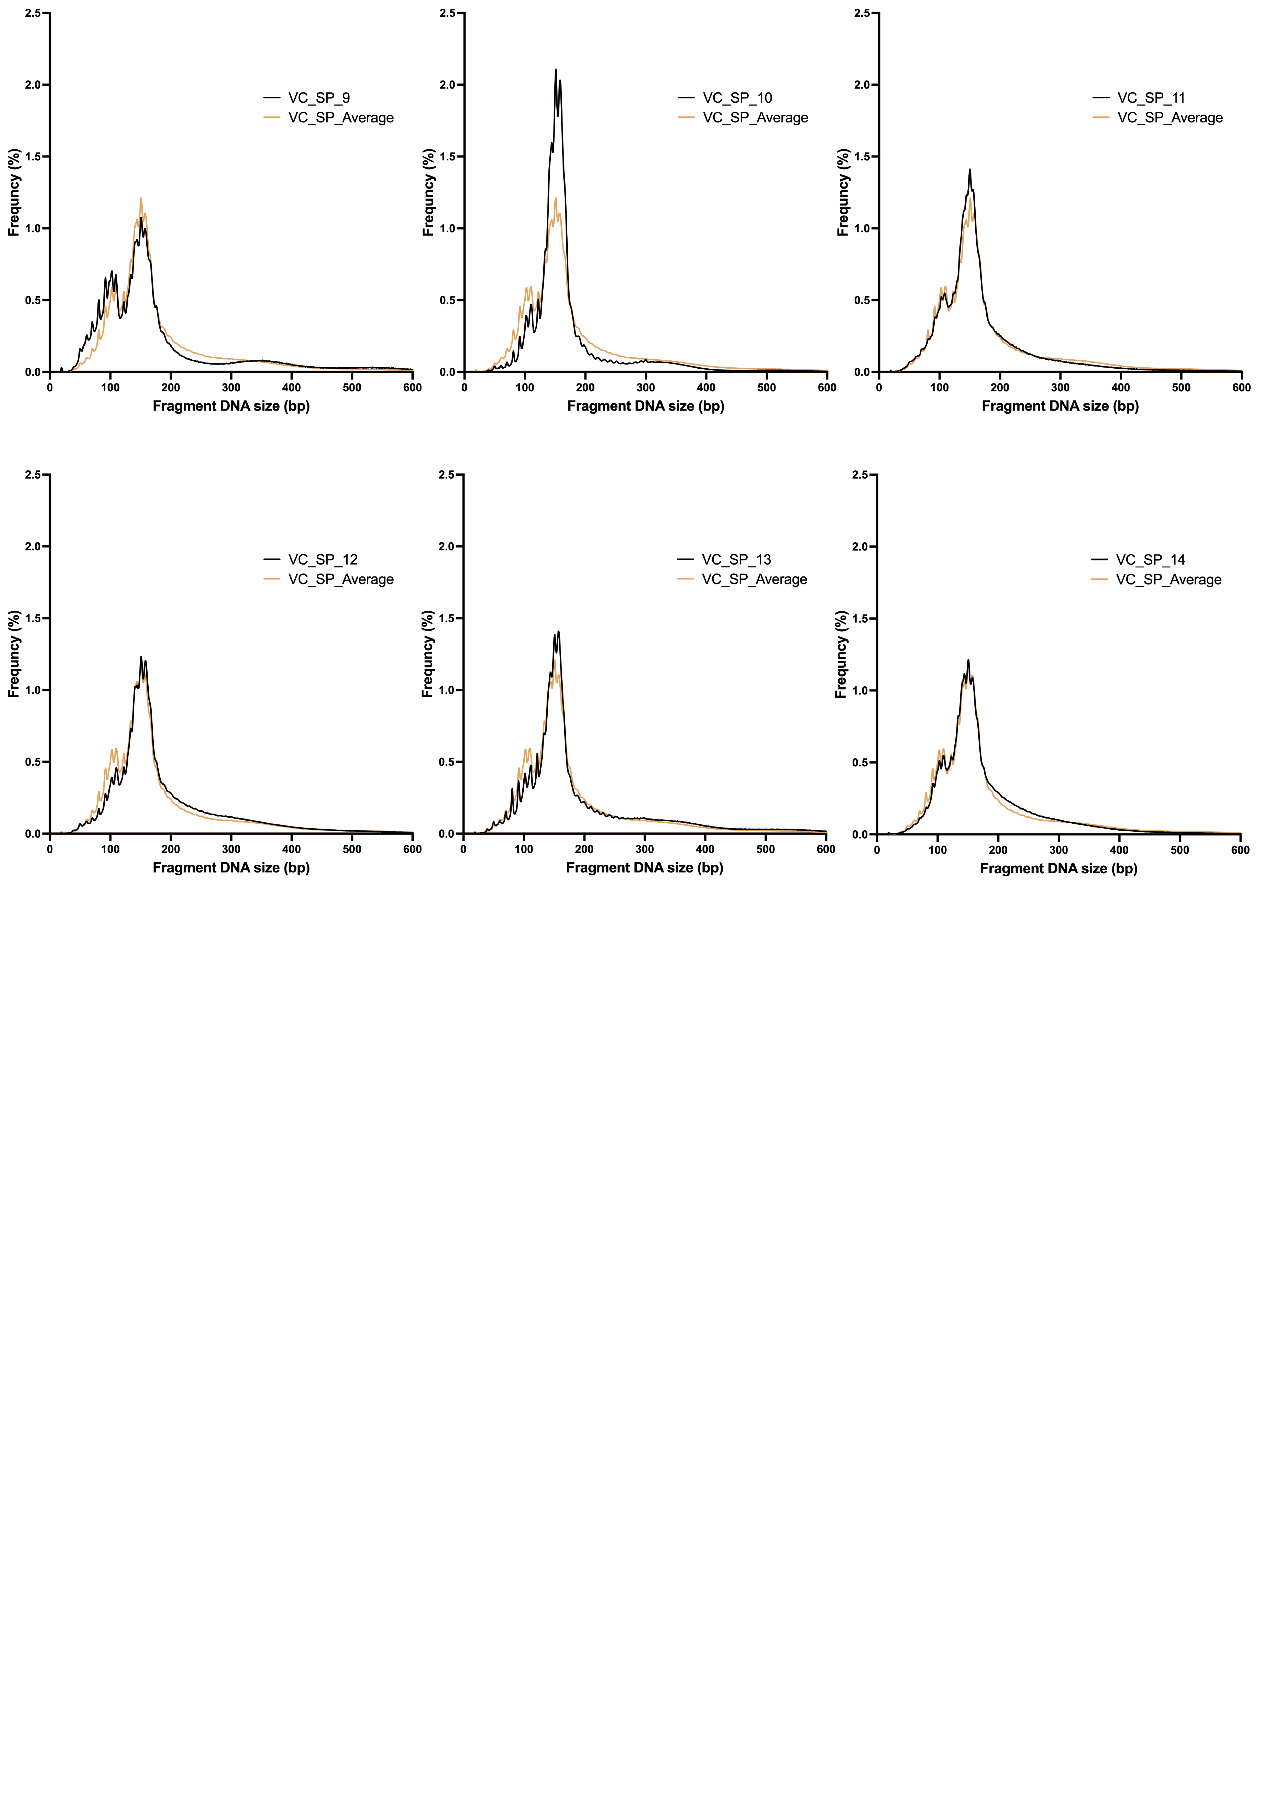
 **Figure S3. Integrated and Individual Size Distributions of VC SP Samples**

Aggregation plot showing a summary of the size distribution of all VC SP samples (n=14). Separate smaller plots show the size distribution of individual VC SP samples and the average of all VC SP.


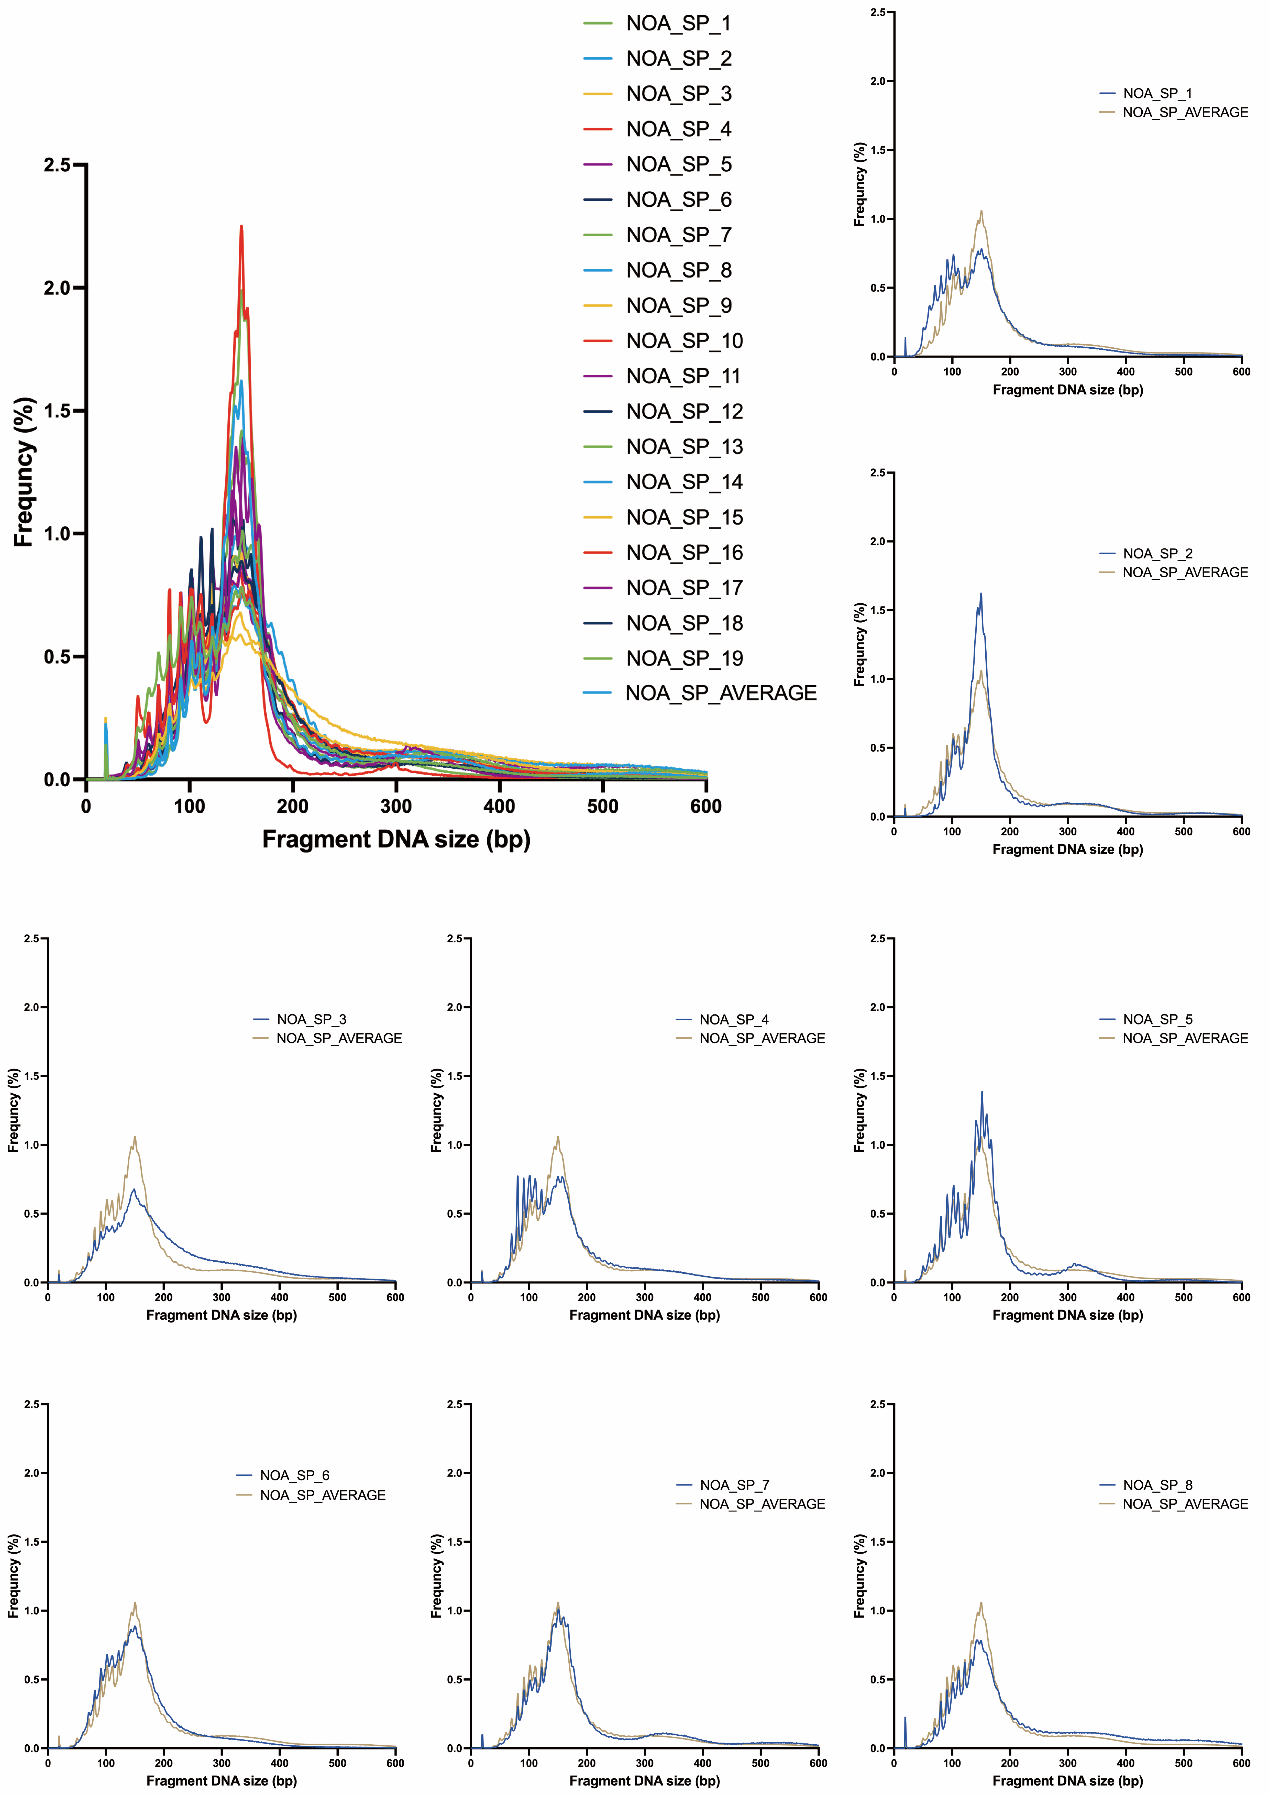

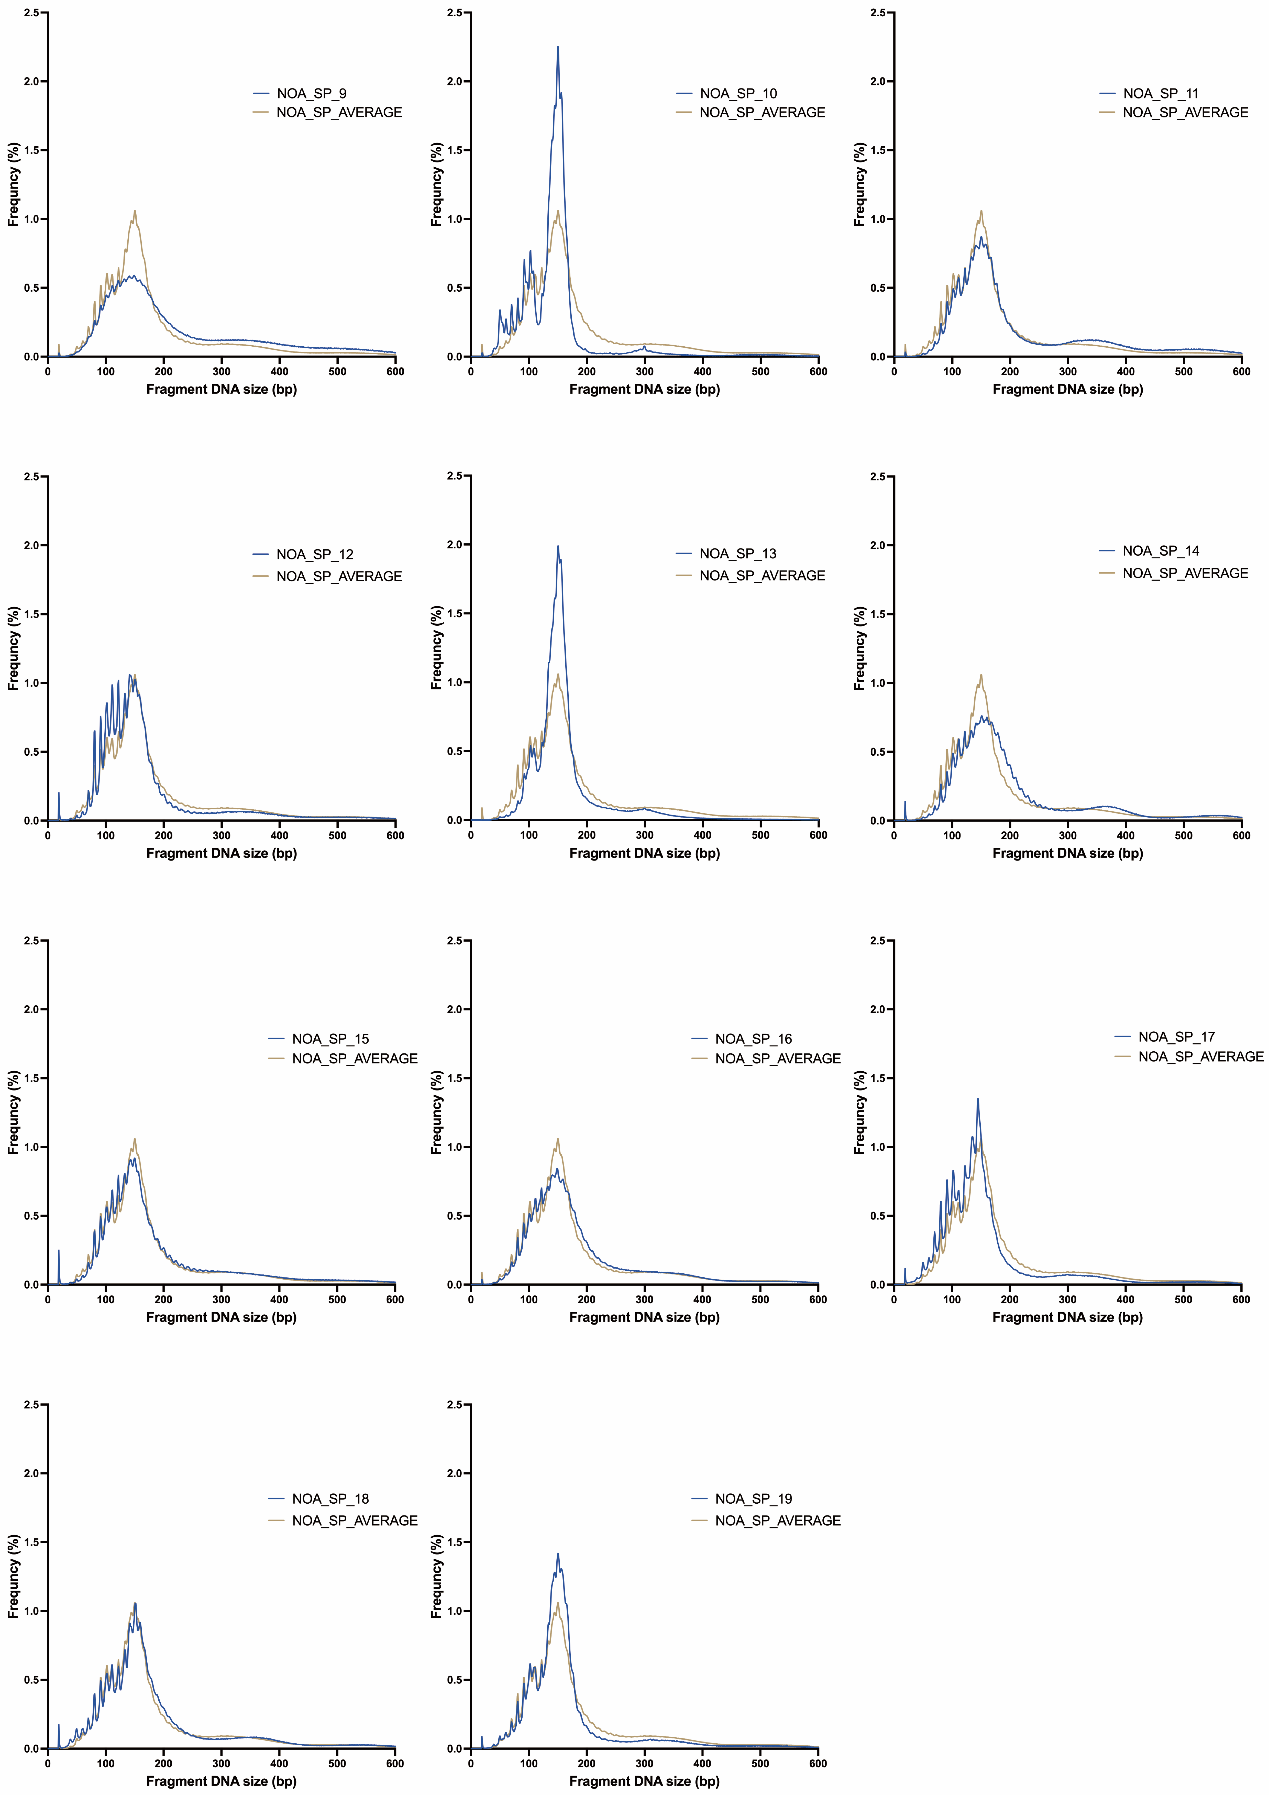


**Figure S4. Integrated and Individual Size Distributions of NOA SP Samples**

Aggregation plot showing a summary of the size distribution of all NOA SP samples (n=19). Separate smaller plots show the size distribution of individual NOA SP samples and the average of all NOA SP.

**Table S1. Clinical characteristics of subjects and samples**

|  | Blood of healthy control | SP of healthy control | SP of VC | SP of NOA |
| --- | --- | --- | --- | --- |
| Age  (year) | 30.00 ± 1.92 | 29.39 ± 1.821 | 29.50 ± 0.96 | 31.69 ± 1.20 |
| Sperm count  (million/ml) | / | 43.58 ± 4.64 | 24.99 ± 7.82 | 0 |
| Sperm total motility (million/ml) | / | 58.32 ± 3.45 | 44.48 ± 8.01 | 0 |

Data represent the mean ± SD.
